# Supplementary material
Source: MDPI journal article supplement (https://www.mdpi.com/2073-4395/11/10/1948)
Supplement: s1 [file s1]

**Table S1.** Sugarcane yellow leaf virus in varieties in primary and secondary seedcane increases at different locations and years.

| Variety   | Location | Stage | Year | Percent infection* |
|-----------|----------|-------|------|--------------------|
| CP06-2042 | A4       | SI    | 2015 | 0.00               |
|           | DU       | SI    | 2015 | 0.00               |
|           | EG       | SI    | 2015 | 0.00               |
|           | HI       | SI    | 2015 | 0.00               |
|           | OK       | SI    | 2015 | 0.00               |
|           | PP       | PI    | 2017 | 0.00               |
|           | SF       | SI    | 2015 | 0.00               |
|           | WD       | SI    | 2015 | 0.00               |
| CP06-2964 | HI       | PI    | 2015 | 0.00               |
|           | TS       | SI    | 2016 | 0.00               |
| CP07-1313 | HI       | PI    | 2015 | 0.00               |
|           | PP       | PI    | 2017 | 0.00               |
|           | TS       | SI    | 2016 | 0.00               |
| CP07-2137 | PF       | SI    | 2015 | 0.00               |
|           | PP       | PI    | 2017 | 0.00               |
| CP07-2320 | A4       | SI    | 2016 | 0.00               |
|           | EG       | SI    | 2016 | 0.00               |
|           | PF       | SI    | 2016 | 0.00               |
|           | PP       | PI    | 2017 | 0.00               |
|           | SF       | SI    | 2016 | 0.00               |
| CP08-1110 | HI       | SI    | 2016 | 0.00               |
|           | PF       | SI    | 2016 | 0.00               |
|           | PP       | PI    | 2017 | 0.00               |
|           | TS       | SI    | 2016 | 0.00               |
| CP08-2022 | A4       | SI    | 2016 | 0.00               |
|           | DU       | SI    | 2016 | 0.00               |
|           | EG       | SI    | 2016 | 0.00               |
|           | HI       | SI    | 2016 | 0.00               |
|           | PF       | SI    | 2016 | 0.00               |
|           | TS       | SI    | 2016 | 0.00               |
| CP09-1098 |          | PI    | 2016 | 0.00               |
|           | A4       | PI    | 2016 | 0.00               |
|           | DU       | PI    | 2016 | 0.00               |
|           | EG       | PI    | 2016 | 0.00               |
| CP09-1132 | HI       | PI    | 2016 | 0.00               |
|           | PF       | PI    | 2016 | 0.00               |
|           | PP       | PI    | 2017 | 0.00               |
|           | SF       | SI    | 2016 | 0.00               |
|           |          | PI    | 2016 | 0.00               |
|           | TS       | SI    | 2016 | 0.00               |
| CP09-1137 |          | PI    | 2016 | 0.00               |
|           |          | PI    | 2016 | 0.00               |
|           | HI       | PI    | 2016 | 0.00               |

|           |    |    |      |      |
|-----------|----|----|------|------|
| CP09-1236 | PF | PI | 2016 | 0.00 |
|           | TS | PI | 2016 | 0.00 |
|           | HI | PI | 2016 | 0.00 |
|           | PF | PI | 2016 | 0.00 |
|           | SF | PI | 2016 | 0.00 |
| CP09-1385 | TS | PI | 2016 | 0.00 |
|           | EG | PI | 2016 | 0.00 |
|           | HI | PI | 2016 | 0.00 |
|           | KN | SI | 2016 | 0.00 |
|           | PF | PI | 2016 | 0.00 |
| CP09-1390 | PP | PI | 2017 | 0.00 |
|           | SH | SI | 2018 | 0.00 |
|           | TS | PI | 2016 | 0.00 |
|           | A4 | PI | 2016 | 0.00 |
|           | EG | PI | 2016 | 0.00 |
| CP09-1430 | HI | PI | 2016 | 0.00 |
|           | KN | SI | 2016 | 0.00 |
|           | SF | SI | 2016 | 0.00 |
|           | TS | SI | 2016 | 0.00 |
|           | WD | SI | 2016 | 0.00 |
| CP09-1512 | A4 | SI | 2016 | 0.00 |
|           | DU | SI | 2016 | 0.00 |
|           | KN | SI | 2016 | 0.00 |
|           | SF | SI | 2016 | 0.00 |
|           | TS | PI | 2016 | 0.00 |
| CP09-1807 | HI | PI | 2016 | 0.00 |
|           | PF | PI | 2016 | 0.00 |
|           | SF | PI | 2016 | 0.00 |
|           | TS | PI | 2016 | 0.00 |
|           | TS | PI | 2016 | 0.00 |
| CP09-1822 | SH | SI | 2018 | 0.00 |
|           |    | PI | 2016 | 0.00 |
|           | TS | SI | 2016 | 0.00 |
|           |    | PI | 2018 | 0.00 |
|           | HI | PI | 2016 | 0.00 |
| CP09-1894 | PF | PI | 2016 | 0.00 |
|           | SF | SI | 2016 | 0.00 |
|           | TS | SI | 2016 | 0.00 |
|           | PP | PI | 2017 | 0.00 |
|           | SH | PI | 2016 | 0.00 |
| CP09-1906 | PP | PI | 2017 | 0.00 |
|           | SH | SI | 2018 | 0.00 |
|           | TS | PI | 2016 | 0.00 |
|           |    |    | 2018 | 0.00 |
|           | A4 | SI | 2016 | 0.00 |
| CP09-1952 | DU | SI | 2016 | 0.00 |
|           | EG | PI | 2016 | 0.00 |
|           | KN | SI | 2016 | 0.00 |
|           |    |    |      |      |

|           |    |    |      |      |
|-----------|----|----|------|------|
| CP09-2002 | SF | SI | 2016 | 0.00 |
|           | TS | PI | 2016 | 0.00 |
|           | A4 | PI | 2016 | 0.00 |
|           | DU | PI | 2016 | 0.00 |
|           | EG | PI | 2016 | 0.00 |
|           | OK | PI | 2016 | 0.00 |
| CP09-2067 | SF | PI | 2016 | 0.00 |
|           | TS | PI | 2016 | 0.00 |
|           | WD | PI | 2016 | 0.00 |
|           | A4 | SI | 2016 | 0.00 |
|           | DU | SI | 2016 | 0.00 |
|           | EG | SI | 2016 | 0.00 |
|           | HI | SI | 2016 | 0.00 |
|           | KN | SI | 2016 | 0.00 |
|           | OK | SI | 2016 | 0.00 |
|           | PF | SI | 2016 | 0.00 |
| CP09-2392 | PP | PI | 2017 | 0.00 |
|           | TS | SI | 2016 | 0.00 |
|           | HI | PI | 2016 | 0.00 |
|           | PF | SI | 2016 | 0.00 |
|           | PP | PI | 2017 | 0.00 |
|           | SF | PI | 2016 | 0.00 |
| CP10-1132 | TS | PI | 2016 | 0.00 |
|           | A4 | PI | 2018 | 0.00 |
|           | HI | SI | 2018 | 0.00 |
|           | PF | PI | 2018 | 0.00 |
|           | PP | PI | 2018 | 0.00 |
|           | SH | PI | 2018 | 0.00 |
| CP10-1134 | TS | PI | 2018 | 0.00 |
|           | HI | PI | 2016 | 0.00 |
|           | PP | PI | 2017 | 0.00 |
| CP10-1177 | SF | PI | 2016 | 0.00 |
|           | TS | PI | 2016 | 0.00 |
|           | PF | PI | 2016 | 0.00 |
|           | PP | PI | 2017 | 0.00 |
|           | SH | PI | 2016 | 0.00 |
| CP10-1189 | TS | PI | 2016 | 0.00 |
|           | PF | PI | 2018 | 0.00 |
|           | PP | PI | 2018 | 0.00 |
|           | SH | PI | 2018 | 0.00 |
|           | TS | PI | 2018 | 0.00 |
| CP10-1208 | DU | PI | 2019 | 0.00 |
|           | HI | PI | 2016 | 0.00 |
|           |    |    | 2018 | 0.00 |
|           | OK | PI | 2017 | 0.00 |
|           | PF | SI | 2018 | 0.00 |
|           |    | PI | 2016 | 0.00 |
|           | PP | PI | 2017 | 0.00 |

|           |    |    |      |        |
|-----------|----|----|------|--------|
|           | SF | PI | 2017 | 0.00   |
|           | SH | SI | 2018 | 0.00   |
|           |    | PI | 2016 | 0.00   |
|           | TS | SI | 2018 | 0.00   |
|           |    | PI | 2016 | 0.00   |
|           | WD | PI | 2017 | 0.00   |
| CP10-1296 | PP | PI | 2017 | 0.00   |
| CP10-1313 | HI | PI | 2016 | 0.00   |
|           | PF | PI | 2016 | 0.00   |
|           | SF | PI | 2016 | 0.00   |
|           | SH | PI | 2016 | 0.00   |
|           | TS | PI | 2017 | 0.00   |
| CP10-1619 | DU | PI | 2016 | 0.00   |
|           | HI | PI | 2016 | 0.00   |
|           |    |    | 2018 | 0.00   |
|           | KN | PI | 2016 | 0.00   |
|           | OK | PI | 2016 | 0.00   |
|           | PF | PI | 2016 | 0.00   |
|           |    |    | 2018 | 0.00   |
|           | PP | PI | 2017 | 0.00   |
|           | SF | PI | 2016 | 0.00   |
|           | SH | SI | 2018 | 0.00   |
|           |    | PI | 2016 | 0.00   |
|           | TS | PI | 2018 | 2.00   |
| CP10-1620 | A4 | PI | 2018 | 10.00  |
|           | HI | PI | 2018 | 3.33   |
|           | TS | PI | 2018 | 4.00   |
| CP10-1716 | PF | PI | 2017 | 38.00  |
|           | PP | PI | 2017 | 10.00  |
|           | SH | PI | 2017 | 8.00   |
|           | TS | PI | 2017 | 40.00  |
| CP10-1734 | HI | PI | 2018 | 14.00  |
|           | PF | PI | 2018 | 2.00   |
|           | PP | SI | 2018 | 2.00   |
|           | SH | PI | 2018 | 6.00   |
|           | TS | PI | 2018 | 2.00   |
| CP10-1938 | HI | PI | 2016 | 100.00 |
|           | PF | PI | 2016 | 100.00 |
|           | PP | PI | 2017 | 100.00 |
|           | SF | PI | 2016 | 30.00  |
|           | SH | PI | 2016 | 100.00 |
|           | TS | PI | 2016 | 6.67   |
| CP10-2002 | HI | PI | 2016 | 80.00  |
|           | PF | PI | 2016 | 76.67  |
|           | PP | PI | 2017 | 6.67   |
|           | SH | PI | 2016 | 10.00  |
|           | TS | PI | 2016 | 20.00  |
| CP10-2149 | HI | PI | 2016 | 43.33  |

|           |    |    |      |        |
|-----------|----|----|------|--------|
| CP10-2195 | PF | PI | 2016 | 23.33  |
|           | PP | PI | 2017 | 63.33  |
|           | SH | PI | 2016 | 20.00  |
|           | A4 | SI | 2019 | 13.33  |
|           |    | PI | 2018 | 6.67   |
|           | HI | PI | 2018 | 3.33   |
|           | PF | SI | 2017 | 3.33   |
|           | PP | SI | 2017 | 6.00   |
|           |    | PI | 2018 | 2.00   |
|           | SH | SI | 2017 | 3.33   |
| CP10-2413 |    | PI | 2018 | 10.00  |
|           | A4 | PI | 2018 | 3.33   |
|           | HI | PI | 2018 | 10.00  |
|           | PF | PI | 2018 | 100.00 |
|           | PP | SI | 2017 | 26.67  |
|           |    | PI | 2018 | 100.00 |
|           | SH | SI | 2017 | 56.67  |
|           | TS | PI | 2018 | 23.33  |
|           | A4 | SI | 2019 | 10.00  |
|           |    | PI | 2018 | 6.00   |
| CP11-1314 |    |    | 2019 | 10.00  |
|           | DU | SI | 2018 | 2.00   |
|           |    |    | 2019 | 2.00   |
|           | EG | SI | 2019 | 16.67  |
|           |    | PI | 2018 | 2.00   |
|           | HI | SI | 2018 | 3.33   |
|           | KN | SI | 2019 | 20.00  |
|           |    | PI | 2018 | 96.67  |
|           | OK | SI | 2017 | 20.00  |
|           |    | PI | 2018 | 46.00  |
| CP11-1325 | PF | PI | 2017 | 16.67  |
|           |    |    | 2018 | 10.00  |
|           | PP | PI | 2017 | 3.33   |
|           | SF | SI | 2017 | 23.33  |
|           |    | PI | 2018 | 33.33  |
|           | SH | SI | 2017 | 3.33   |
|           |    | PI | 2017 | 3.33   |
|           |    |    | 2018 | 3.33   |
|           | TS | PI | 2017 | 6.67   |
|           |    |    | 2018 | 60.00  |
| CP11-1325 | WD | SI | 2017 | 93.33  |
|           |    | PI | 2018 | 38.00  |
|           | A4 | PI | 2019 | 86.67  |
|           | PF | PI | 2017 | 100.00 |
|           | PP | PI | 2017 | 83.33  |
|           | SH | PI | 2017 | 10.00  |
|           |    |    |      |        |

|           |    |    |      |        |
|-----------|----|----|------|--------|
| CP11-1640 | TS | PI | 2017 | 46.67  |
|           | SH | PI | 2017 | 6.67   |
| CP11-1956 | KN | PI | 2018 | 20.00  |
|           | SF | SI | 2017 | 100.00 |
| CP11-2123 |    | PI | 2018 | 16.67  |
|           | TS | PI | 2018 | 3.33   |
|           | WD | PI | 2018 | 16.67  |
|           | A4 | PI | 2019 | 66.67  |
|           | PF | PI | 2017 | 36.67  |
| CP11-2248 | TS | PI | 2017 | 10.00  |
|           | A4 | PI | 2018 | 16.67  |
|           | EG | PI | 2018 | 3.33   |
|           | OK | PI | 2018 | 3.33   |
|           | SH | PI | 2018 | 3.33   |
| CP12-1417 | TS | PI | 2018 | 3.33   |
|           | WD | PI | 2018 | 43.33  |
|           | OK | PI | 2017 | 100.00 |
|           | SH | PI | 2017 | 40.00  |
|           | EG | PI | 2019 | 93.33  |
| CP12-2035 | OK | PI | 2017 | 86.67  |
|           | SF | PI | 2017 | 40.00  |
|           | SH | PI | 2017 | 100.00 |
|           | EG | PI | 2019 | 96.67  |
|           | KN | PI | 2019 | 3.33   |
| CP12-2213 | OK | PI | 2017 | 3.33   |
|           | SF | PI | 2017 | 3.33   |
|           | SH | PI | 2017 | 2.00   |
|           | A4 | PI | 2019 | 3.33   |
|           | DU | PI | 2019 | 16.00  |
| CP12-2441 | EG | PI | 2019 | 4.00   |
|           | KN | PI | 2019 | 3.33   |
|           | OK | PI | 2017 | 4.00   |
|           | SF | PI | 2017 | 93.33  |
|           | SH | PI | 2017 | 100.00 |
| CP12-2479 | WD | PI | 2017 | 3.33   |
|           | SF | PI | 2017 | 3.33   |
|           | A4 | SI | 2019 | 92.00  |
|           |    | PI | 2018 | 3.33   |
|           | DU | SI | 2018 | 6.00   |
| CP11-1956 |    |    | 2019 | 100.00 |
|           | EG | SI | 2019 | 23.33  |
|           |    | PI | 2018 | 100.00 |
|           | KN | SI | 2019 | 82.00  |
|           | OK | SI | 2017 | 100.00 |
|           |    | PI | 2018 | 6.67   |
|           | SH | SI | 2017 | 100.00 |
|           |    | PI | 2018 | 3.33   |
|           | WD | SI | 2017 | 54.00  |

|           |    |    |      |        |
|-----------|----|----|------|--------|
| CP11-2248 | A4 | SI | 2019 | 16.00  |
|           | DU | SI | 2018 | 14.00  |
|           |    |    | 2019 | 94.00  |
|           | EG | SI | 2019 | 100.00 |
|           | KN | SI | 2019 | 34.00  |
|           |    | PI | 2018 | 13.33  |
|           | OK | SI | 2017 | 50.00  |
|           | SF | SI | 2017 | 50.00  |
|           |    | PI | 2018 | 13.33  |
|           | SH | SI | 2017 | 100.00 |
|           | WD | SI | 2017 | 18.00  |
| CP11-2423 | PP | PI | 2017 | 23.33  |
|           | SH | PI | 2017 | 6.67   |
| CP12-1417 | A4 | PI | 2019 | 13.33  |
|           | DU | PI | 2019 | 6.67   |
|           | EG | PI | 2019 | 40.00  |
|           | KN | PI | 2019 | 6.67   |
|           | SF | PI | 2017 | 3.23   |
|           | WD | PI | 2017 | 26.67  |
| CP12-2035 | A4 | PI | 2019 | 100.00 |
|           | DU | PI | 2019 | 80.00  |
|           | KN | PI | 2019 | 20.00  |
|           | WD | PI | 2017 | 6.67   |
| CP12-2213 | A4 | PI | 2019 | 33.33  |
|           | DU | PI | 2019 | 23.33  |
|           | WD | PI | 2017 | 3.33   |
| CP12-2479 | A4 | PI | 2019 | 100.00 |
|           | DU | PI | 2019 | 83.33  |
|           | EG | PI | 2019 | 6.67   |
|           | KN | PI | 2019 | 53.33  |
|           | OK | PI | 2017 | 26.67  |
|           | SH | PI | 2017 | 10.00  |
|           | WD | PI | 2017 | 43.33  |
| CP98-1968 | A4 | PI | 2019 | 66.67  |
|           | PF | PI | 2017 | 63.33  |
|           | PP | PI | 2017 | 90.00  |
|           | SH | PI | 2017 | 90.00  |
|           | TS | PI | 2017 | 6.67   |

---

Primary increase (PI); Secondary increase (SI); Locations are Area 4 (A4), Duda (DU), Eastgate (EG), Hilliard (HI), Knight (KN), Okeelanta (OK), Pahokee Produce (PP), Perry Farm (PF), Shawnee (SH), South Florida (SF), Townsite (TS), and Wedgeworth (WD).
